# Supplementary material for: Age-related alterations of brain metabolic network based on [18F]FDG-PET of rats
Source: Aging (Albany NY). 2022 Jan 25;14(2):923–42. doi: 10.18632/aging.203851 (PMC8833125; doi:10.18632/aging.203851)
Supplement: Supplementary Tables [file aging-14-203851-s002.pdf]

## SUPPLEMENTARY TABLES

**Supplementary Table 1. Results of inter-individual variability among the aged rats by the leave-one-out(LOO) method.**

| No. | r     | p      |
|-----|-------|--------|
| 1   | 0.998 | <0.001 |
| 2   | 0.998 | <0.001 |
| 3   | 0.997 | <0.001 |
| 4   | 0.997 | <0.001 |
| 5   | 0.990 | <0.001 |
| 6   | 0.971 | <0.001 |
| 7   | 0.991 | <0.001 |
| 8   | 0.999 | <0.001 |
| 9   | 0.997 | <0.001 |
| 10  | 0.998 | <0.001 |
| 11  | 0.987 | <0.001 |
| 12  | 0.995 | <0.001 |
| 13  | 0.987 | <0.001 |
| 14  | 0.989 | <0.001 |
| 15  | 0.988 | <0.001 |
| 16  | 0.988 | <0.001 |
| 17  | 0.950 | <0.001 |
| 18  | 0.992 | <0.001 |
| 19  | 0.998 | <0.001 |
| 20  | 0.996 | <0.001 |
| 21  | 0.998 | <0.001 |
| 22  | 0.979 | <0.001 |
| 23  | 0.997 | <0.001 |

No., the number of the removing rat during the leave-one-out procedure; r, the correlation coefficient of the Mantel test between the group-level metabolic network after removing the specific rat and the original network; p, p value of the Mantel's r statistics by 1000-time permutational tests (p<0.05 is considered as significant).

**Supplementary Table 2. Results of inter-individual variability among the young rats by the leave-one-out (LOO) method.**

| <b>No.</b> | <b>r</b> | <b>p</b> |
|------------|----------|----------|
| 1          | 0.998    | <0.001   |
| 2          | 0.993    | <0.001   |
| 3          | 0.995    | <0.001   |
| 4          | 0.998    | <0.001   |
| 5          | 0.992    | <0.001   |
| 6          | 0.996    | <0.001   |
| 7          | 0.986    | <0.001   |
| 8          | 0.998    | <0.001   |
| 9          | 0.999    | <0.001   |
| 10         | 0.994    | <0.001   |
| 11         | 0.998    | <0.001   |
| 12         | 0.997    | <0.001   |
| 13         | 0.998    | <0.001   |
| 14         | 0.994    | <0.001   |
| 15         | 0.995    | <0.001   |
| 16         | 0.974    | <0.001   |
| 17         | 0.994    | <0.001   |
| 18         | 0.996    | <0.001   |
| 19         | 0.996    | <0.001   |
| 20         | 0.983    | <0.001   |
| 21         | 0.989    | <0.001   |
| 22         | 0.993    | <0.001   |
| 23         | 0.992    | <0.001   |
| 24         | 0.992    | <0.001   |

No., the number of the removing rat during the leave-one-out procedure; r, the correlation coefficient of the Mantel test between the group-level metabolic network after removing the specific rat and the original network; p, p value of the Mantel's r statistics by 1000-time permutational tests (p<0.05 is considered as significant).
